# Supplementary material for: Evaluating polymerization kinetics using microrheology
Source: Royal Society of Chemistry journal article supplement (doi:10.1039/d4py00188e), 2024-01-01
Supplement: d4py00188e1.pdf [file d4py00188e1.pdf]

## Evaluating Polymerization Kinetics Using Microrheology

Pedro Salas-Ambrosio,<sup>1,3</sup> Caidric I. Gupit,<sup>2</sup> Juan Manuel Urueña,<sup>3</sup> Yimin Luo,<sup>2,4</sup> Jeanne M. Hankett,<sup>5</sup> Rohini Gupta,<sup>6</sup> Megan T. Valentine,<sup>2\*</sup> Heather D. Maynard,<sup>1,3\*</sup> Matthew E. Helgeson<sup>4\*</sup>

<sup>1</sup> Department of Chemistry and Biochemistry and California Nano Systems Institute, University of California Los Angeles, Los Angeles, CA, USA

<sup>2</sup> Department of Mechanical Engineering, University of California Santa Barbara, Santa Barbara, CA, USA

<sup>3</sup> BioPACIFIC Materials Innovation Platform, California Nano Systems Institute, University of California Santa Barbara, Santa Barbara, CA, USA

<sup>4</sup> Department of Chemical Engineering, University of California Santa Barbara, Santa Barbara, CA, USA

<sup>5</sup> BASF Corporation, Wyandotte, MI, USA

<sup>6</sup> BASF Corporation, California Research Alliance, Berkeley, CA, USA

⊕ Equal contribution

‡ Current Address: Department of Mechanical Engineering and Materials Science, Yale University, New Haven, CT, USA

\* Corresponding author

## Samples for calibration

**Table S1.** Properties of the poly(dimethylacrylamide) polymers used in calibration measurements to determine the Mark-Houwink constants (eq 5), such as the degree of polymerization (DP) expected from the molar equivalent of monomer relative to the chain transfer agent,  $n_{eq}$ , the DP from proton nuclear magnetic resonance ( $^1\text{H-NMR}$ ) spectroscopy, the molecular weight,  $M$ , expected from the  $n_{eq}$ , the number-average molecular weight,  $M_n$ , from size-exclusion chromatography (SEC), the dispersity,  $\mathcal{D}$ , also from SEC, and the yield.

| DP (expected) | DP ( $^1\text{H-NMR}$ ) | $M$ (expected;<br>kg/mol) | $M_n$ (SEC;<br>kg/mol) | $\mathcal{D}$ (SEC) | Yield (%) |
|---------------|-------------------------|---------------------------|------------------------|---------------------|-----------|
| 50            | 56                      | 5.0                       | 4.4                    | 1.16                | 82        |
| 75            | 75                      | 7.4                       | 8.5                    | 1.17                | 67        |
| 100           | 94                      | 9.9                       | 10.8                   | 1.19                | 85        |
| 140           | 148                     | 13.9                      | 14.7                   | 1.23                | 80        |
| 175           | 172                     | 17.3                      | 18.1                   | 1.25                | 85        |
| 200           | 206                     | 19.8                      | 20.2                   | 1.27                | 77        |
| 300           | 317                     | 29.7                      | 22.3                   | 1.31                | 86        |
| 400           | 411                     | 39.7                      | 42.6                   | 1.32                | 86        |
| 500           | 513                     | 49.6                      | 50.2                   | 1.32                | 86        |

For calibration to determine the Mark-Houwink constants (eq 5), polymer samples with different viscosity-averaged molecular weights,  $M_v$ , were prepared by varying the molar equivalent of monomer relative to the chain transfer agent,  $n_{eq}$ , from 50 to 500. The resulting degree of polymerization (DP) and molecular weights were then confirmed from experimental measurements, where the DP was estimated from proton nuclear magnetic resonance ( $^1\text{H-NMR}$ ) spectroscopy data using

$$DP = \frac{\frac{I_{2CH3}}{6} + \frac{I_{CH2}}{2}}{2} \quad (\text{S1})$$

where  $I_{2CH3}$  and  $I_{CH2}$  are the integrations of the two methyl groups (3.15–2.64 ppm) and the methylene group (1.80–0.95 ppm), respectively, on the poly(dimethylacrylamide) backbone.

**Table S1** shows the experimental values of the DP from  $^1\text{H-NMR}$ , the number-averaged molecular weight,  $M_n$ , from size-exclusion chromatography (SEC), the dispersity,  $\mathcal{D}$ , also from SEC, and the yield, in comparison with the expected values of the DP and molecular weight from  $n_{eq}$ . The experimental DP and  $M_n$  values were consistent with their corresponding expected values, differing only by factors of 0.9–1.1 and 0.8–1.1, respectively. In addition,  $\mathcal{D}$  values remained low and within the range of 1.16–1.32, while the yields were 67–86 %.

## Newtonian rheology of poly(dimethylacrylamide) solutions

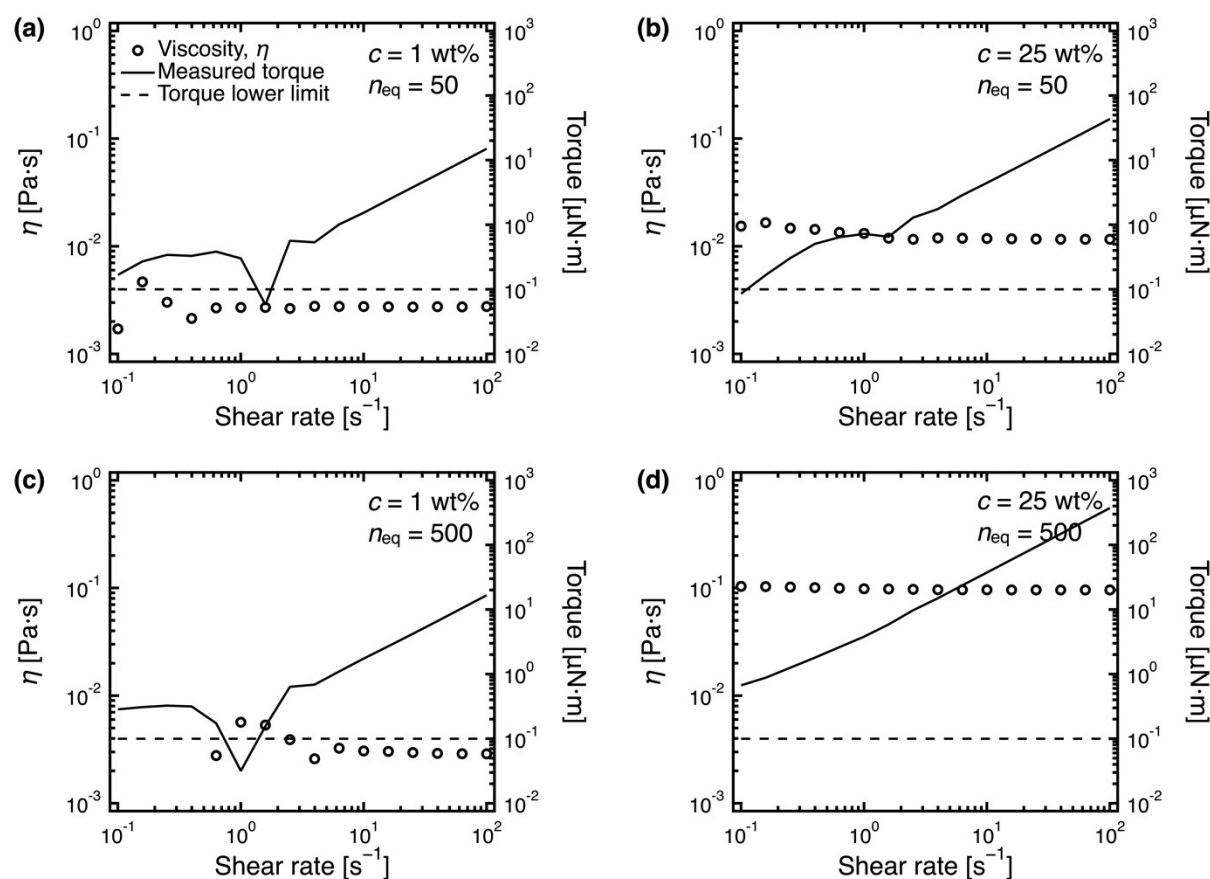

**Figure S1.** Solution viscosity,  $\eta$ , (empty circles) and torque (solid line) measured using bulk rheology as a function of shear rate at different polymer concentrations,  $c$ , and molar equivalents of monomer relative to the chain transfer agent,  $n_{eq}$ : (a)  $c = 1$  wt%,  $n_{eq} = 50$ ; (b)  $c = 25$  wt%,  $n_{eq} = 50$ ; (c)  $c = 1$  wt%,  $n_{eq} = 500$ ; (d)  $c = 25$  wt%,  $n_{eq} = 500$ . The dashed line represents the lower limit of the torque resolution of the rheometer.

**Figure S1** shows the solution viscosity,  $\eta$ , measured using bulk rheology as a function of shear rate at the polymer concentrations,  $c$ , of 1 wt% and 25 wt%, and molar equivalents of monomer relative to the chain transfer agent,  $n_{eq}$ , of 50 and 500 or DP of 44 and 506, respectively. The lower limit of the torque resolution of the rheometer is indicated by the dashed line in **Figure S1**. Beyond this limit, the viscosity was independent of the shear rate in all cases, confirming the Newtonian behavior of the samples. Since the values of  $c$  and DP in **Figure S1** generally encompass the range of  $c$  and DP of the samples for calibration with  $c = 4$  wt% and DP = 44 to 506, and the kinetically evolving samples undergoing polymerization with  $c = 1.2$  to 23.1 wt% and DP = 21 to 234, these samples are expected to behave as Newtonian fluids as well.

## Mean-squared displacement from DDM microrheology

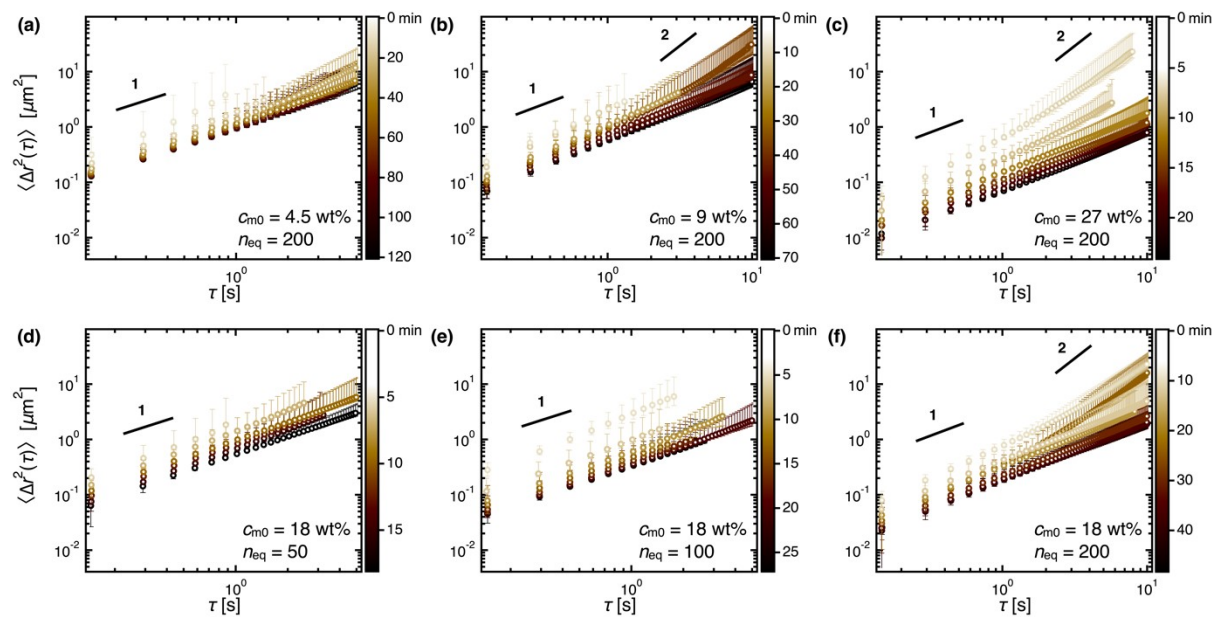

**Figure S2.** Mean-squared displacement,  $\langle \Delta r^2(\tau) \rangle$ , as a function of lag time,  $\tau$ , at various times after initiation of the polymerization represented by the color bar and at various (a–c) initial monomer concentrations,  $C_{m0}$ , and (d–f) molar equivalents of monomer relative to the chain transfer agent,  $n_{eq}$ . The error bars represent standard deviations after ensemble averaging using the differential dynamic microscopy (DDM) analysis.<sup>1</sup>

### Validation of viscosity from DDM microrheology

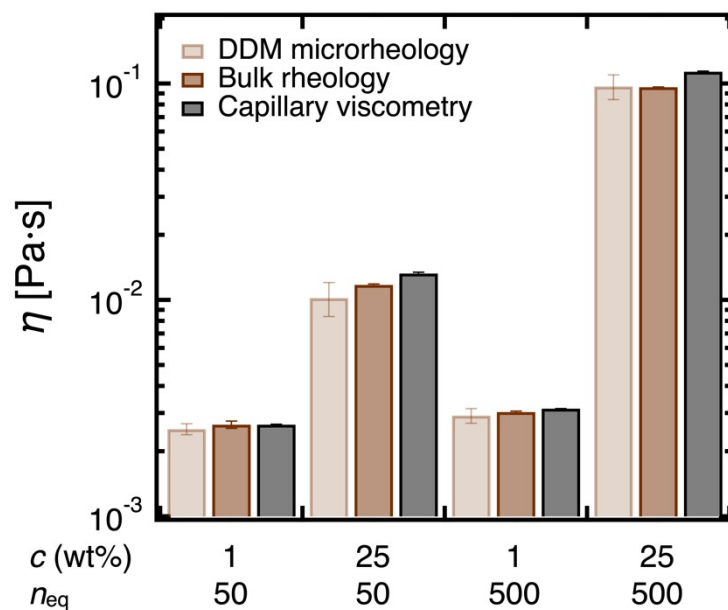

**Figure S3.** Solution viscosity,  $\eta$ , at the polymer concentrations,  $c$ , of 1 wt% and 25 wt% and molar equivalents of monomer relative to the chain transfer agent,  $n_{eq}$ , of 50 and 500 determined from differential dynamic microscopy (DDM) microrheology, bulk rheology at the shear rate of  $10 \text{ s}^{-1}$ , and capillary viscometry. The error bars represent standard deviations of three replicate measurements.

### Viscosity from mean-squared displacement and intermediate scattering function

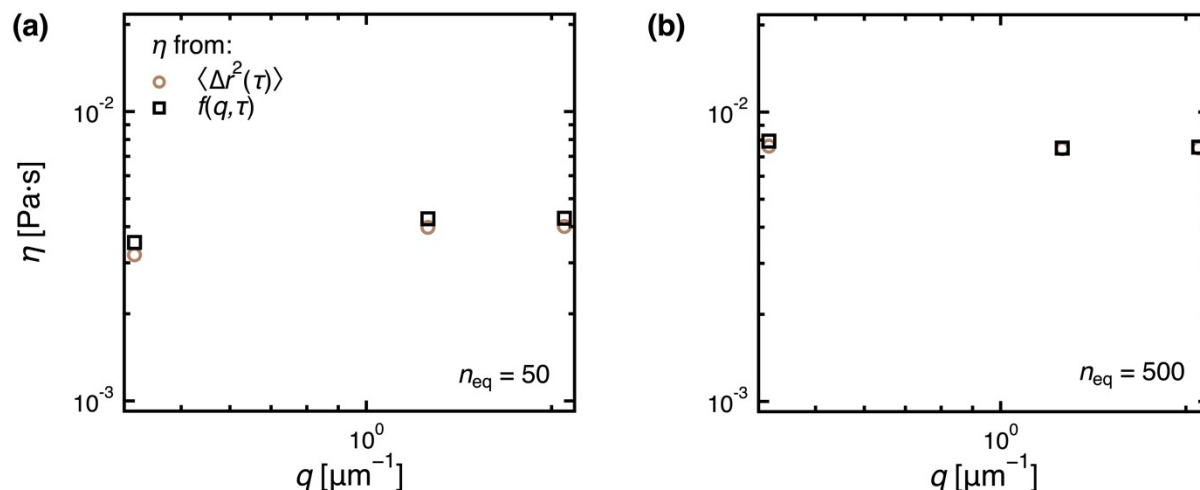

**Figure S4.** Solution viscosity,  $\eta$ , as a function of wave vector,  $q$ , at molar equivalents of monomer relative to the chain transfer agent,  $n_{\text{eq}}$ , of (a) 50 and (b) 500. The  $\eta$  values were determined from the mean-squared displacement,  $\langle \Delta r^2(\tau) \rangle$ , (circles) by using eqs 3 and 4, and from the intermediate scattering function,  $f(q, \tau)$ , (squares) by fitting with the exponential function  $f(q, \tau) = \exp(-2Dq^2\tau)$  then using the diffusion coefficient,  $D$ , to calculate  $\eta$  (eq 4). The error bars represent standard deviations of the best-fit curves which are smaller than the data markers themselves.

# Spectra from NMR spectroscopy

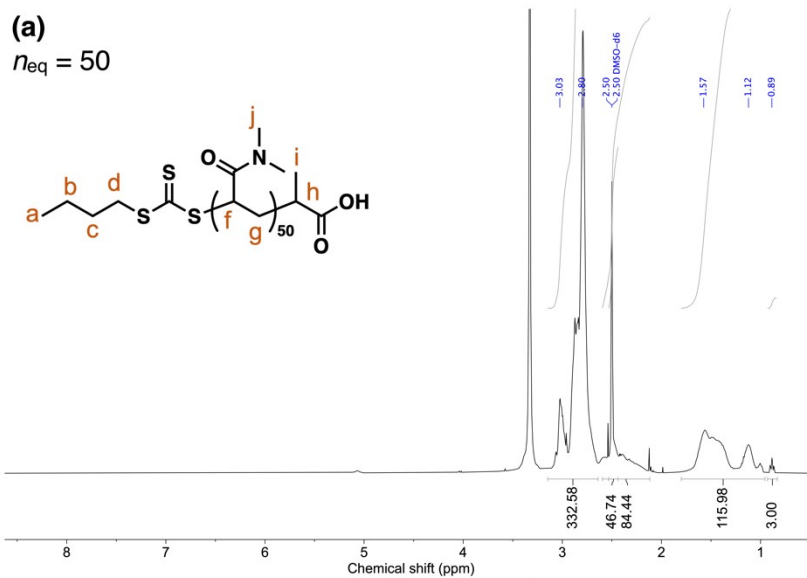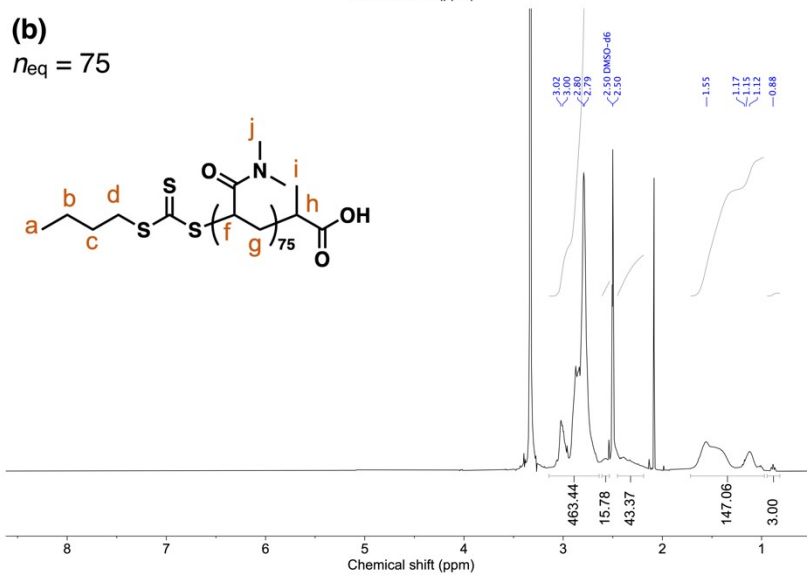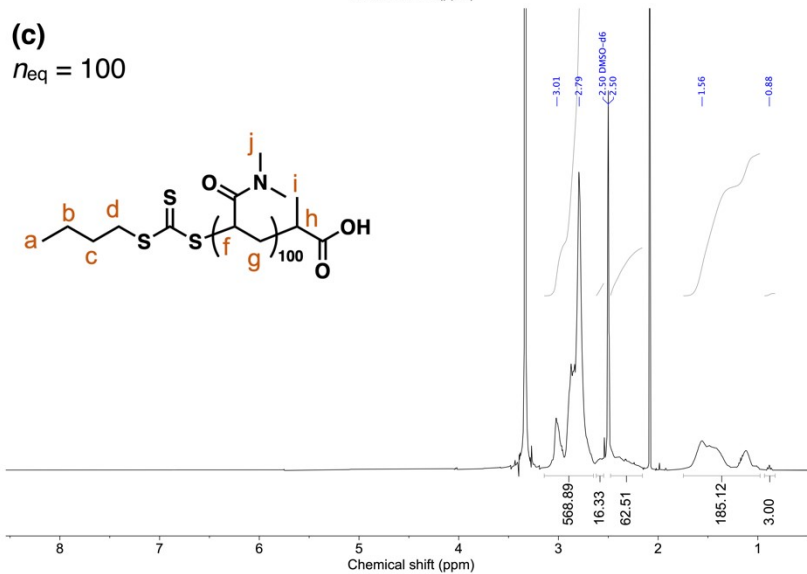

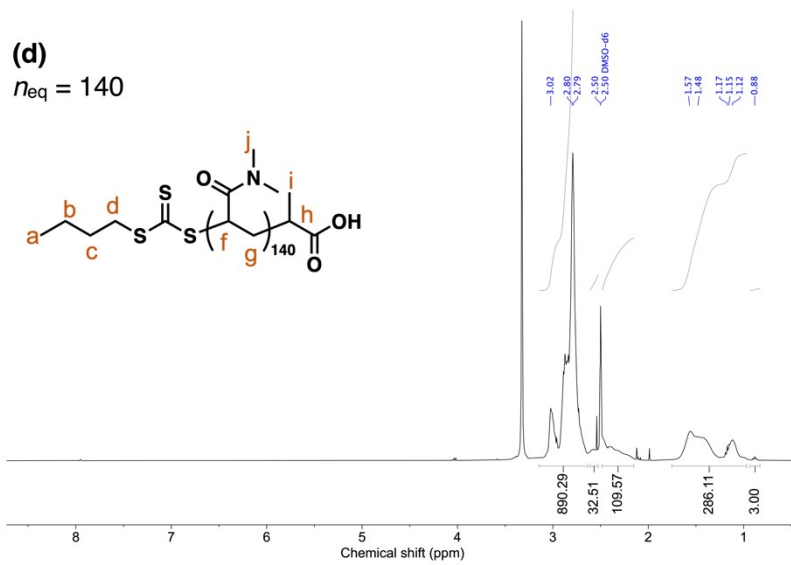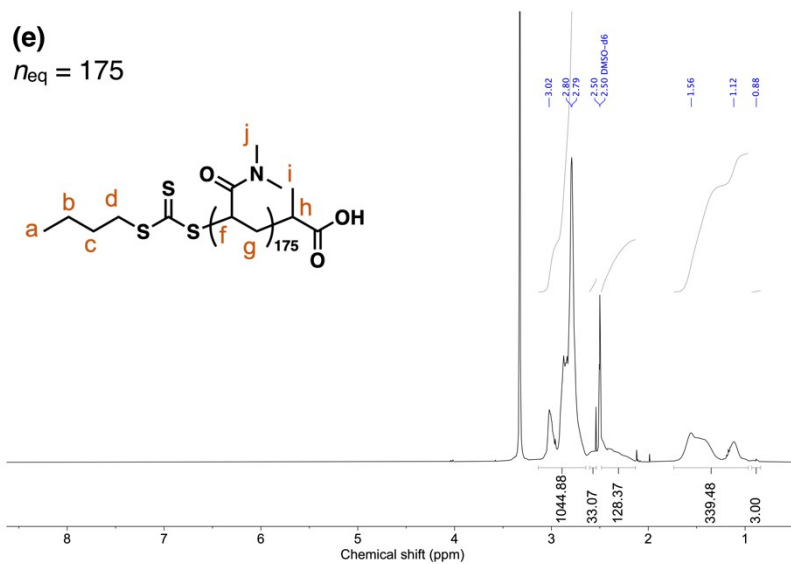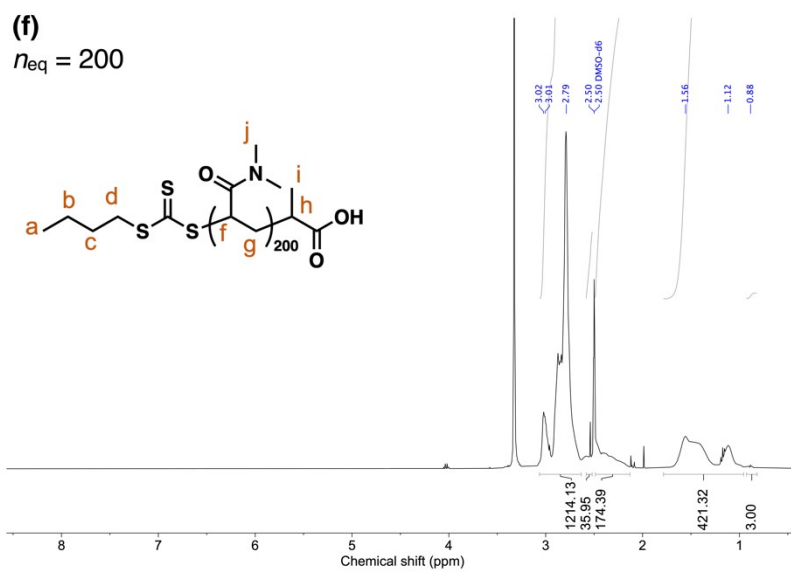



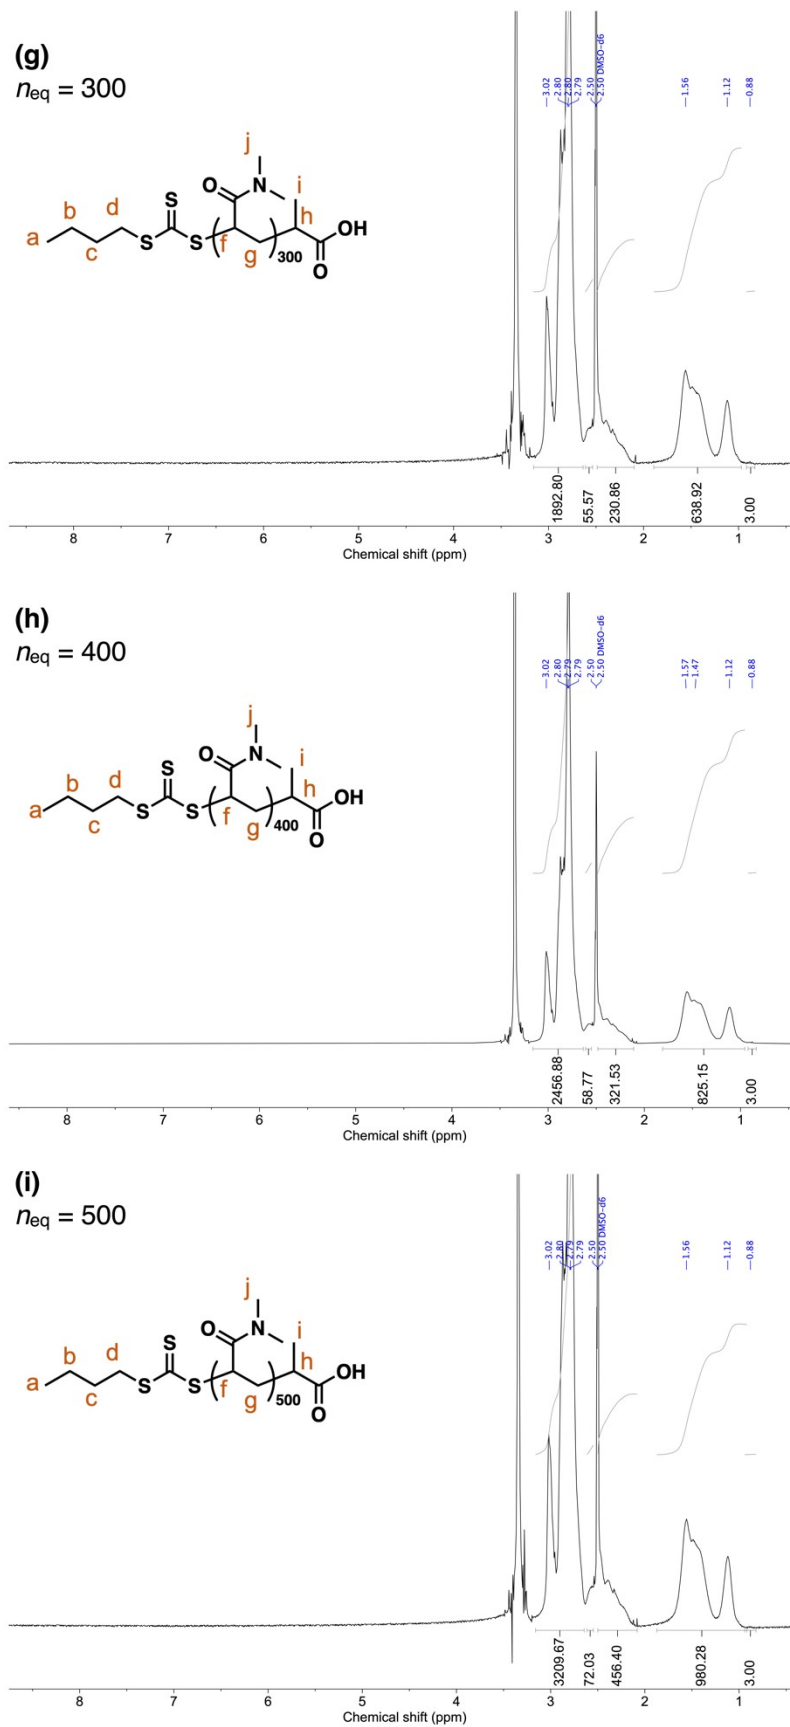

**Figure S5.** Representative spectra from proton nuclear magnetic resonance ( $^1\text{H-NMR}$ ) spectroscopy measurements of poly(dimethylacrylamide) in  $\text{DMSO-d}_6$  at various molar equivalents of monomer relative to the chain transfer agent,  $n_{eq}$ , and after polymerization for 16 h.

## Chromatograms from SEC

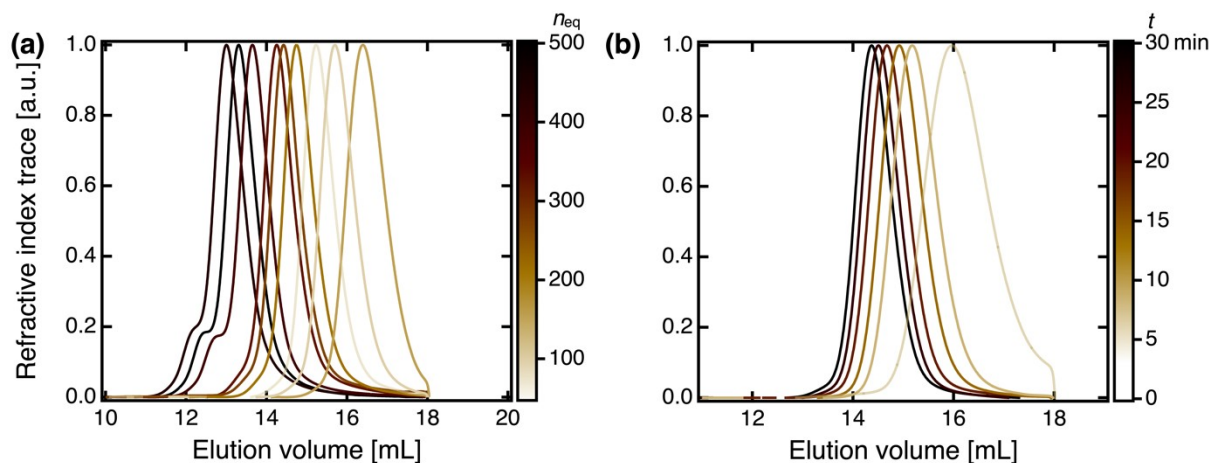

**Figure S6.** Representative chromatograms from size-exclusion chromatography (SEC) measurements of poly(dimethylacrylamide) (a) at various molar equivalents of monomer relative to the chain transfer agent,  $n_{eq}$ , represented by the color bar and after polymerization for 16 h; and (b) at initial monomer concentration,  $c_{m0}$ , of 18 wt%,  $n_{eq}$  of 200, and various times,  $t$ , after initiation of the polymerization represented by the color bar.

### Dispersities from SEC

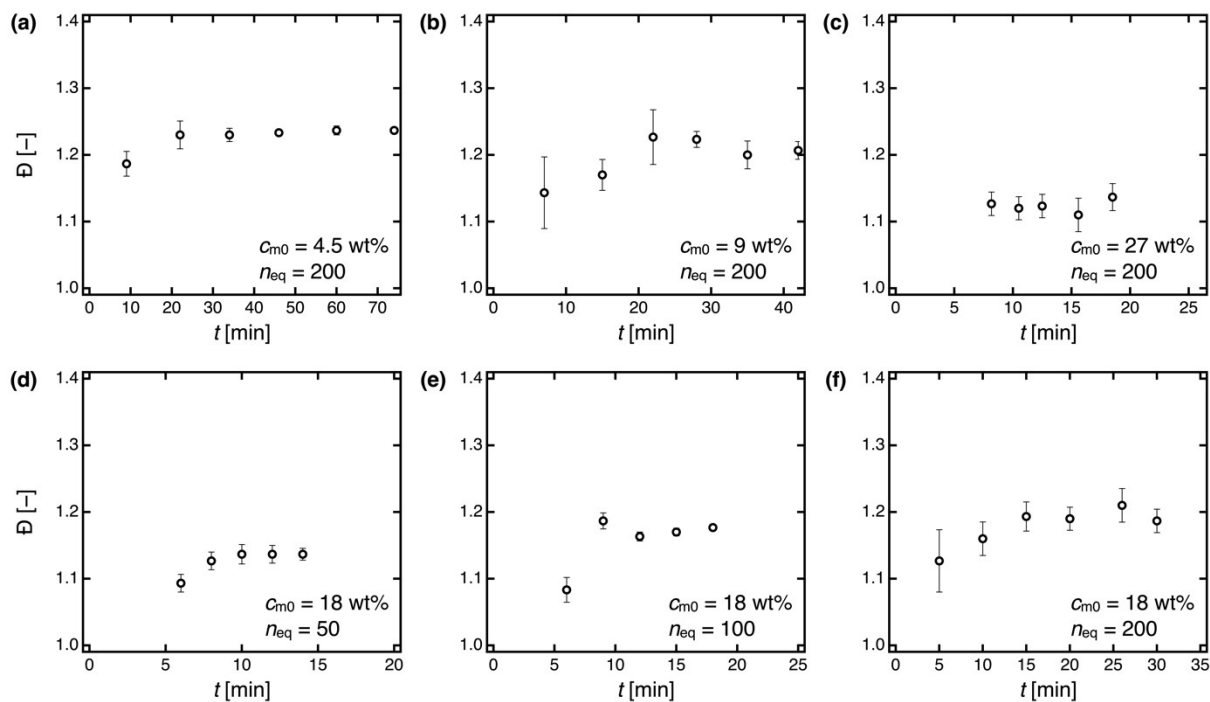

**Figure S7.** Dispersity,  $\mathcal{D}$ , measured using SEC as a function of polymerization time,  $t$ , at various (a–c) initial monomer concentrations,  $c_{m0}$ , and (d–f) molar equivalents of monomer relative to the chain transfer agent,  $n_{eq}$ . The error bars represent standard deviations of six replicate measurements. The dispersities remained low and within the range of 1.1–1.2 during polymerization of all samples demonstrating the controlled RAFT polymerization.

### Reaction conversions from NMR spectroscopy

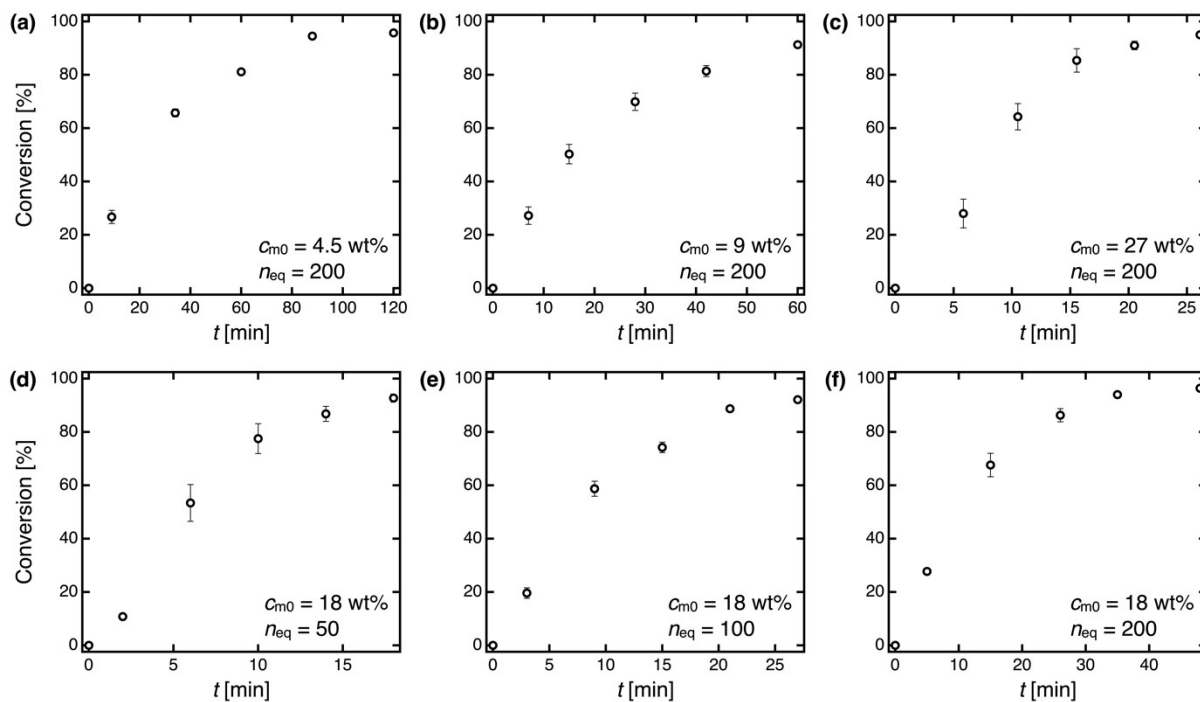

**Figure S8.** Reaction conversion measured using NMR as a function of polymerization time,  $t$ , at various (a–c) initial monomer concentrations,  $C_{m0}$ , and (d–f) molar equivalents of monomer relative to the chain transfer agent,  $n_{eq}$ . The error bars represent standard deviations of six replicate measurements. The conversions were as high as 91–97% for the samples at  $C_{m0}$  of 4.5–27.0 wt% and  $n_{eq}$  of 50–200, further demonstrating the controlled reaction in RAFT polymerization producing polymers with predetermined molecular weights.<sup>2</sup>

### Determination of rate constants

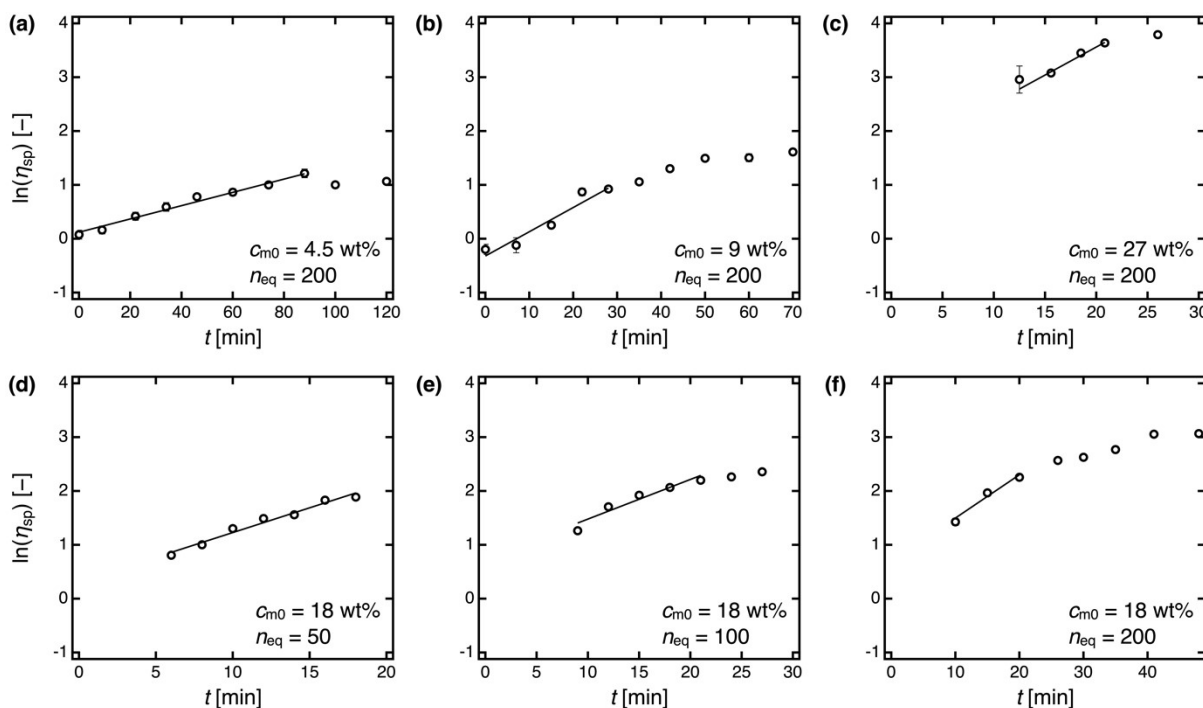

**Figure S9.** Natural logarithm of the specific viscosity,  $\ln(\eta_{sp})$ , as a function of polymerization time,  $t$ , at various (a–c) initial monomer concentrations,  $c_{m0}$ , and (d–f) molar equivalents of monomer relative to the chain transfer agent,  $n_{eq}$ . The error bars represent standard deviations of six replicate measurements. The solid lines indicate the weighted linear fit.

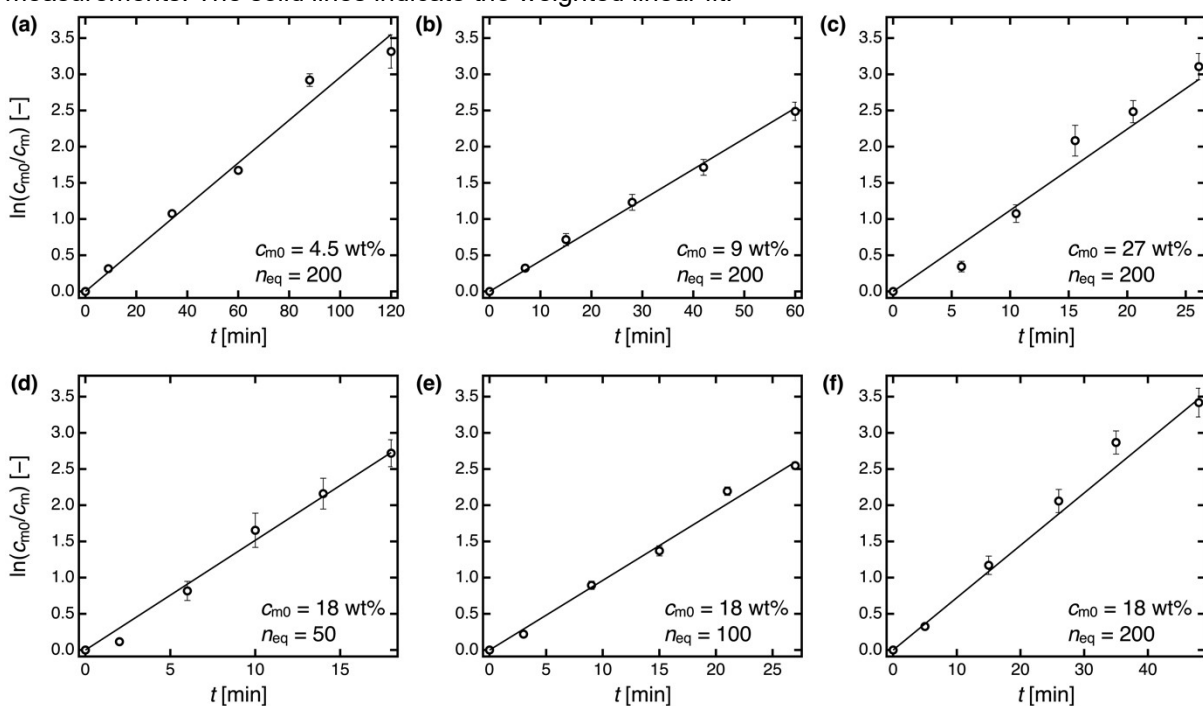

**Figure S10.** Natural logarithm of the monomer concentration,  $\ln(c_{m0}/c_m)$  where  $c_{m0}$  and  $c_m$  are the initial and instantaneous concentrations of free monomer, respectively, as a function of polymerization time,  $t$ , at various (a–c)  $c_{m0}$  and (d–f) molar equivalents of monomer relative to the chain transfer agent,  $n_{eq}$ . The error bars represent standard deviations of six replicate measurements. The solid lines indicate the weighted linear fit.

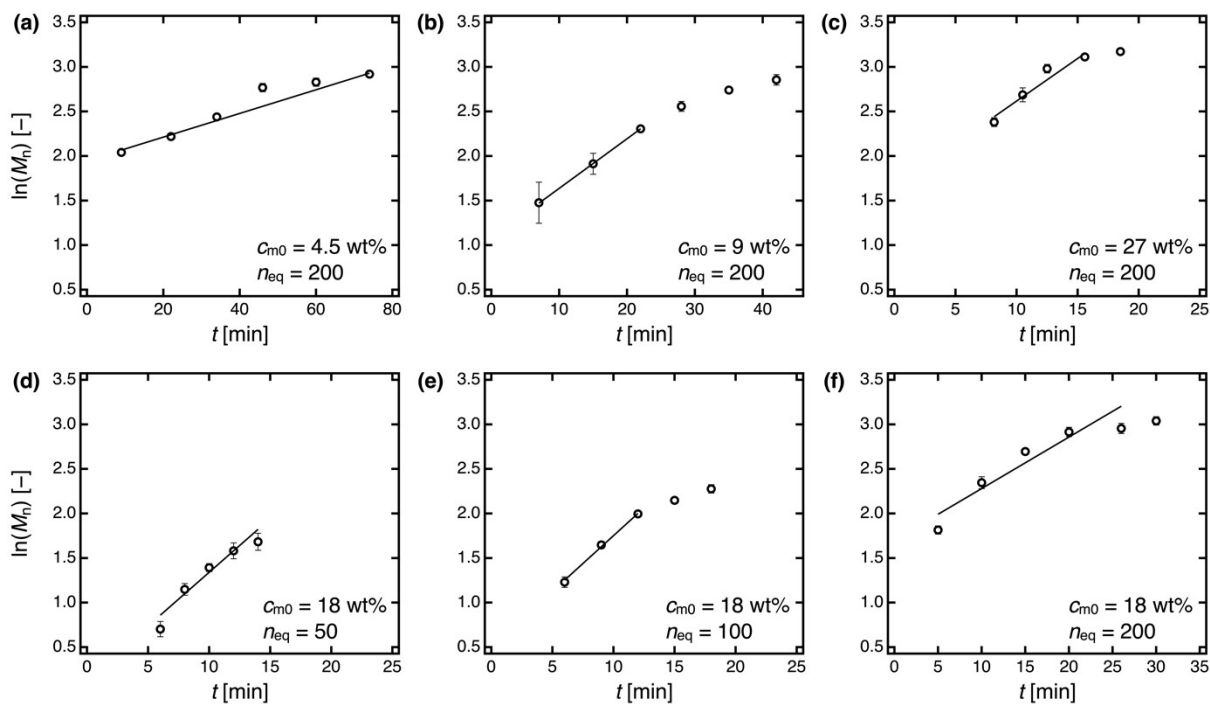

**Figure S11.** Natural logarithm of the number-average molecular weight,  $\ln(M_n)$ , as a function of polymerization time,  $t$ , at various (a–c) initial monomer concentrations,  $c_{m0}$ , and (d–f) molar equivalents of monomer relative to the chain transfer agent,  $n_{eq}$ . The error bars represent standard deviations of six replicate measurements. The solid lines indicate the weighted linear fit.

### Goodness of linear fit

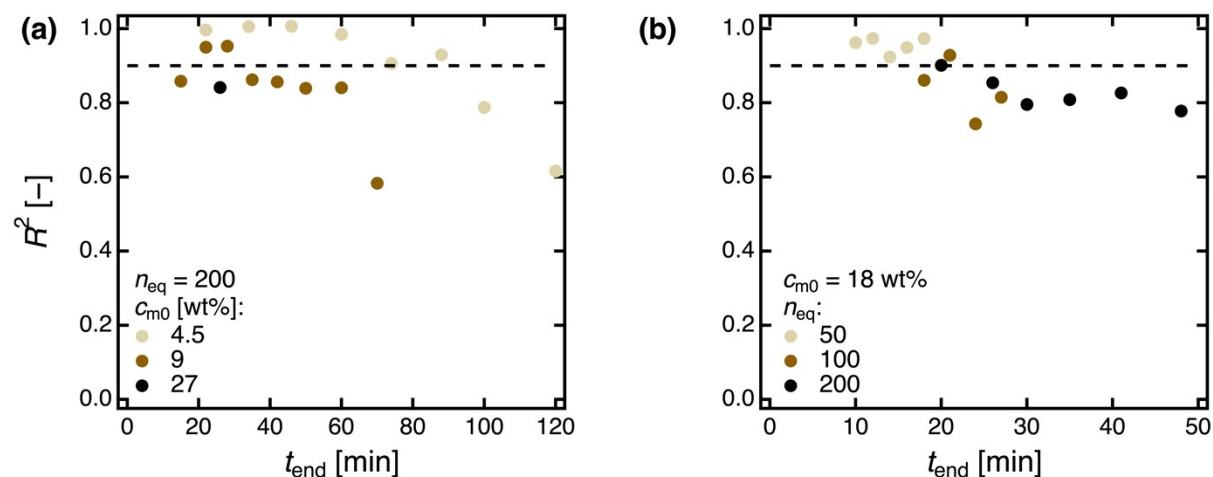

**Figure S12.** Coefficient of determination,  $R^2$ , as a function of the ending time point,  $t_{end}$ , included in the linear fit of  $\ln(\eta_{sp})$  vs  $t$  plots (**Figure S9**) at various (a) initial monomer concentrations,  $c_{m0}$ , and (b) molar equivalents of monomer relative to the chain transfer agent,  $n_{eq}$ . Dashed lines indicate the lower threshold value of  $R^2 = 0.9$  determining the range of time points included in the fit.

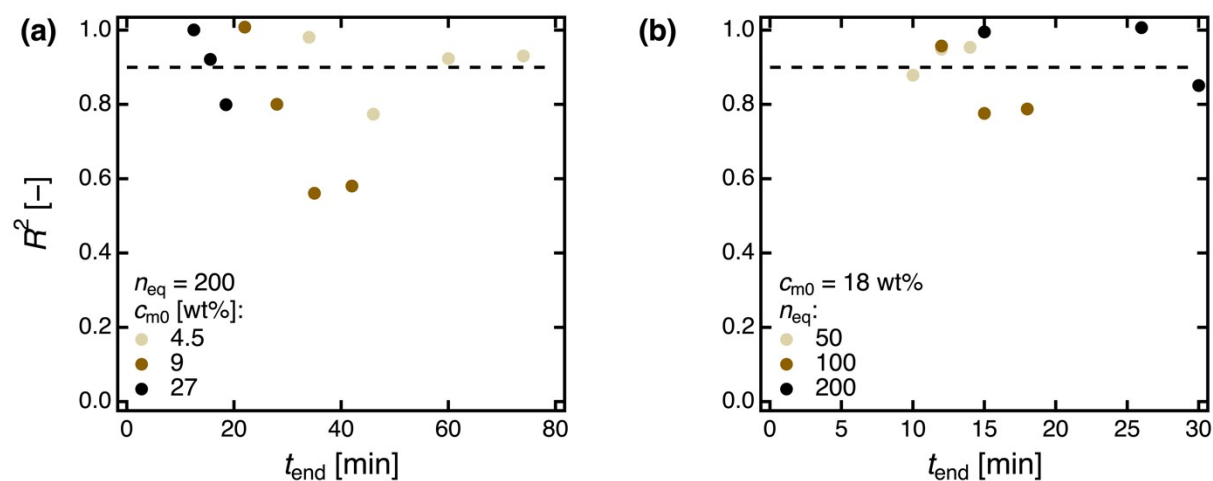

**Figure S13.** Coefficient of determination,  $R^2$ , as a function of the ending time point,  $t_{end}$ , included in the linear fit of  $\ln(M_n)$  vs  $t$  plots (**Figure S11**) at various (a) initial monomer concentrations,  $c_{m0}$ , and (b) molar equivalents of monomer relative to the chain transfer agent,  $n_{eq}$ . Dashed lines indicate the lower threshold value of  $R^2 = 0.9$  determining the range of time points included in the fit.

## Validation of Rao-Yaseen equation

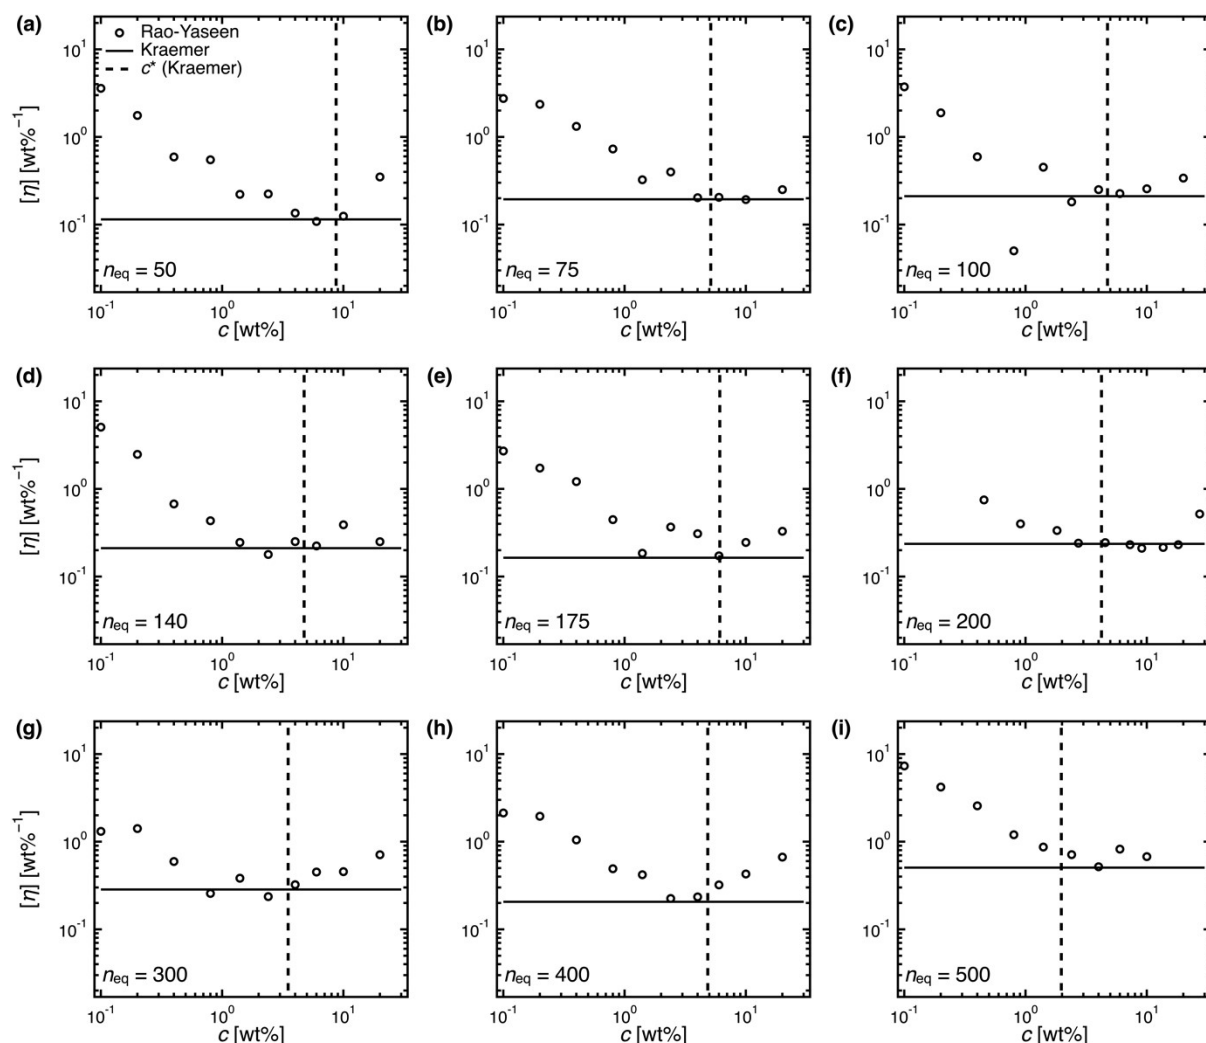

**Figure S14.** Intrinsic viscosity,  $[\eta]$ , estimated using the Rao-Yaseen<sup>3</sup> (eq S2; empty circles) and Kraemer<sup>4</sup> (eq S3; solid lines) equations as a function of polymer concentration,  $c$ , at various molar equivalents of monomer relative to the chain transfer agent,  $n_{eq}$ . The dashed lines represent the overlap concentration,  $c^* = 1/[\eta]$ , estimated using the Kraemer equation.

The Rao-Yaseen equation<sup>3</sup> (eq S2) is a single-point method providing a simple, fast, and low-cost means to estimate the intrinsic viscosity,  $[\eta]$ , from the solution viscosity,  $\eta$ , measured at a single polymer concentration,  $c$ . The  $[\eta]$  values estimated using this equation were compared with those estimated using the Kraemer equation<sup>4</sup> (eq S3) which is the conventional and standard method to estimate  $[\eta]$  from  $\eta$  measured at different values of  $c$  and then extrapolated to  $c = 0$ .

$$[\eta] = \frac{1}{2c}[\eta_{sp} + \ln(\eta_{rel})] \quad (\text{S2})$$

$$\frac{\ln(\eta_{rel})}{c} = [\eta] + (k_H - 1/2)[\eta]^2 c \quad (\text{S3})$$

where  $\eta_{sp} = (\eta - \eta_s)/\eta_s$  is the specific viscosity,  $\eta_{rel} = \eta/\eta_s$  is the relative viscosity,  $\eta_s$  is the viscosity of the pure solvent, and  $k_H$  is the Huggins coefficient.



**Figure S14** shows  $[\eta]$  estimated using the Rao-Yaseen and Kraemer equations as functions of  $c$  at various  $n_{eq}$ . Note that the upturn in  $[\eta]$  at low  $c$  is attributed to the low sensitivity of DDM microrheology to detect the changes in  $\eta$  with  $c$  when the polymer concentration or, equivalently, the solution viscosity is low. Beyond this upturn,  $[\eta]$  obtained from both equations showed good agreement with each other for the  $c$  range of about 4–20 wt% and the entire  $n_{eq}$  range. This validates the use of the Rao-Yaseen equation to quickly and accurately estimate  $[\eta]$  at least within this range of  $c$  and  $n_{eq}$ . In addition,  $[\eta]$  is ideally estimated in the dilute regime or below the overlap concentration<sup>4</sup>,  $c^*$ , shown as dashed lines in **Figure S14**. Considering the  $c^*$  and the  $c$  range of validity of the Rao-Yaseen equation, samples at 4 wt% were then measured to estimate  $[\eta]$  at various  $M_v$  (**Figure 5**) to determine the Mark-Houwink constants.

In addition, the range of validity of the Rao-Yaseen equation of  $c = 4$  to 20 wt% and  $n_{eq} = 50$  to 500 or DP = 44 to 506 coincides well with the experimentally measured  $c = 1.2$  to 23.1 wt% and DP = 21 to 234 during polymerization. Therefore, this validates the use of the Rao-Yaseen equation, along with the Mark-Houwink equation, to convert the time-dependent data during polymerization to the apparent viscosities and apparent molecular weights (**Figures 6-7**).

### Expression for polymer concentration in terms of rate constant

The instantaneous polymer concentration,  $c$ , at a certain time,  $t$ , during the polymerization is expressed in terms of the rate constant,  $k$ , through a first-order rate equation confirmed from the NMR measurements (**Figure S10**),

$$-\frac{dc_m}{dt} = kc_m \quad (\text{S4})$$

Which is integrated,

$$-\int_{c_{m0}}^{c_m} \frac{dc_m}{c_m} = \int_{t_0}^t k dt \quad (\text{S5})$$

$$\frac{c_{m0}}{c_m} = e^{kt} \quad (\text{S6})$$

Where  $c_m$  is related to the instantaneous concentration of reacted monomer,  $c_{m,r}$ , by

$$c_m = c_{m0} - c_{m,r} \quad (\text{S7})$$

By substituting eq S7 into eq S6, an expression for  $c_{m,r}$  is defined,

$$c_{m,r} = \frac{c_{m0}(e^{kt} - 1)}{e^{kt}} \quad (\text{S8})$$

$c_{m,r}$  is then related to  $c$  by

$$c = \frac{c_{m,r}}{DP} = c_{m,r} \frac{M_m}{M} \quad (\text{S9})$$

Where  $DP = M/M_m$ ,  $M_m$  is the molecular weight of the monomer, and  $M$  is the instantaneous molecular weight of the polymer during polymerization. To avoid using  $M$  from SEC in estimating  $c$ , eq S9 is multiplied by  $M$ , effectively converting  $c$  in units of mol/L to  $cM$  in units of g/L which is further converted to wt% using the solution density, which is the concentration unit used in this work. Using eqs S8 and S9, an expression for  $c$  in terms of  $k$ , along with  $c_{m0}$  and  $M_m$  which are known beforehand, is derived,

$$cM = c_{m,r} M_m = \frac{c_{m0}(e^{kt} - 1)}{e^{kt}} M_m \quad (\text{S10})$$

### References

- (1) Bayles, A. V.; Squires, T. M.; Helgeson, M. E. Probe Microrheology without Particle Tracking by Differential Dynamic Microscopy. *Rheologica Acta* **2017**, *56* (11), 863–869.
- (2) Perrier, S. 50th Anniversary Perspective: RAFT Polymerization—A User Guide. *Macromolecules* **2017**, *50* (19), 7433–7447.

- (3) Rao, M. V. R. M.; Yaseen, M. Determination of Intrinsic Viscosity by Single Specific Viscosity Measurement. *J. Appl. Polym. Sci.* **1986**, 31 (8), 2501–2508.
- (4) Rubinstein, M.; Colby, R. H. *Polymer Physics*; Oxford University Press; 2003.
